# Supplementary material for: The interception of a copper-based carbene radical with an α-carbonyl diazomethane radical: C1/C1N2 copolymerization
Source: Royal Society of Chemistry journal article supplement (doi:10.1039/c5cc03716f), 2015-01-01
Supplement: c5cc03716f1.pdf [file c5cc03716f1.pdf]

Supporting Information for

**Interception Copper-based Carbene Radical with  $\alpha$ -Carbonyl  
Diazomethane Radical: C1/C1N2 Copolymerization**

*Feifei Li, Longqiang Xiao, Yan Li, Cheng Chen and Lijian Liu\**

Department of Polymer Science, College of Chemistry and Molecular Sciences, Wuhan  
University, Wuhan 430072, China

E-mail: liulj@whu.edu.cn

## Methods

### Materials

All experiments were carried out in distilled solvents under dry nitrogen atmosphere. The solvents were purchased from Sinopharm Chemical Reagent Co. Ltd and distilled before use. 2,2,6,6-tetramethylpiperidine 1-oxy (TEMPO, 98%, Aldrich), *N*-*tert*-butyl- $\alpha$ -phenylnitron (PBN, 98%, Aldrich) and 5, 5-dimethyl-1-pyrroline-N-oxide (DMPO, 98%, Adamas Reagent Co. Ltd) were stored at -20 °C and used as received.

### Instruments

<sup>1</sup>H and <sup>13</sup>C NMR spectra were recorded on a Mercury VX-300 spectrometer (300 MHz) using CDCl<sub>3</sub> as solvent and trimethylsilane (TMS) as the internal standard.

The number-average molecular weight ( $M_n$ ) and polydispersity index (PDI,  $M_w/M_n$ ) of the polymer samples were determined by gel permeation chromatography (GPC) calibrated with polystyrene standards in THF solution (1.0 mL min<sup>-1</sup>) at 30 °C and GPC is equipped with a Waters 717 plus auto sampler, a Waters 1515 isocratic HPLC pump, a Waters 2414 refractive index detector, and Shodex K-805, K-804, and K-802.5 columns in series.

Matrix-assisted laser desorption/ionization time of flight (MALDI-TOF) mass spectrometric analyses were performed on Shimadzu Biotech Axima TOF spectrometer.

Elemental analysis (EA) data were collected using a Vario EL instrument.

Online infrared (IR) spectra were collected on an is10 (Thermo) with a fiber optical system (MultiLoop-MIR) designed for infrared sampling of liquids (detection range: 1600-3400 cm<sup>-1</sup>).

Ultraviolet-visible (UV-vis) spectra were recorded on an UV-3600 (Shimadzu) equipment.

Steady-state fluorescence spectra were recorded on RF-5301PC (Shimadzu).

FT-IR spectra were recorded on a Thermo is10 spectrometer.

Raman spectra were recorded on an RM-1000 confocal Raman microscope (Renishaw) with an excitation wavelength of 514.5 nm using an Ar<sup>+</sup> laser.

X-ray photoelectron spectroscopic (XPS) measurements were performed on an X-ray photoelectron spectroscopy (XSAM800, Kratos, UK).

Scanning electron microscopy (SEM) observation was done by a Sirion 200 field emission scanning electron microscope (FEI Co., Eindhoven).

Energy dispersive X-ray spectroscopy (EDS) spectra were recorded by JEM-2100 (HR) using nickel screen as sample carriers.

Differential scanning calorimetry (DSC) was performed on a Q20 (TA) instrument with nitrogen as the protecting gas.

Thermo gravimetric analysis (TGA) was measured with a NETZSCHSTA 449C thermal analyzer (NETZSCHSTA, Germany) with nitrogen as the protecting gas. The oligomer was heated with a rate of 20 °C / min.

X-band Electron paramagnetic resonance (EPR) spectra were recorded on Bruker Biospin A200 spectrometer. Conditions: Sweep Width: 100.00 G; Microwave Frequency: 9.417 GHz; Microwave Power: 19.510 mW; Modulation amplitude of 1.00 G; Modulation Frequency: 100.00 kHz. The spectra were simulated by iteration of the anisotropic g-values, hyperfine coupling constants, and line widths using Biomolecular EPR Spectroscopy Software developed by W. R. Hagen.

Geometry of all systems was optimized by BP86 density functional method in combination with

def2-SVP basis-set. When evaluating single-point energies, the basis-set used was upgraded to def2-TZVP. ORCA 3.0.3 program was used to conduct the calculations. In order to evaluate the distribution of the unpaired electron and thus examine the radical site, Multiwfn 3.3.7 program was employed to calculate spin density and obtain spin population via Mulliken method.

#### **Preparation of poly(imidazole-Cu) catalyst**

The poly(imidazole-Cu) was prepared by self-assembly of CuSO<sub>4</sub> and amphiphilic poly[(*N*-vinylimidazole)-*co*-(*N*-isopropylacrylamide)] in CHCl<sub>3</sub>/H<sub>2</sub>O solution *via* coordinative convolution method at 70 °C. The SEM image reveals poly(imidazole-Cu) formed blocky-aggregated structure and the EDS analysis confirms the existence of the copper species (Figure S1).

#### **Poly(imidazole-Cu)-catalyzed decomposition of EDA**

A solution of toluene or CHCl<sub>3</sub> (10 ml), and poly(imidazole-Cu) catalyst (50 mg) was stirred under argon atmosphere at predetermined temperature for 30 min and then EDA (1 ml, 9.45 mmol) was introduced to the system. After 17 hours of reaction, the heterogeneous catalysts were isolated and the filtrates were concentrated to precipitate from petroleum ether to give atactic copolymers as yellow products (Table S1).

#### **Tracing the reaction process of poly(imidazole-Cu)-mediated decomposition of EDA using online IR spectroscopy**

A solution of toluene (10 ml), poly(imidazole-Cu) catalysts (30 mg) was stirred under argon for 10 min at pre-determined temperature and then EDA (300 mg, 2.63 mmol) was introduced to the system to start the polymerization reaction as well as the data collection.

#### **The effects of TEMPO on the reaction process of poly(imidazole-Cu)-mediated decomposition of EDA**

A solution of toluene (10 ml), TEMPO (0.1 g, 0.64 mmol) and poly(imidazole-Cu) (50 mg) was stirred under argon at 60 °C for 5 min and then EDA (300 mg, 2.63 mmol) was introduced to the system. The disappearance of the 2110 cm<sup>-1</sup> stretching band was followed continuously to depict the decomposition dynamics of EDA in the presence of TEMPO.

#### **Spin-trapping of radical intermediates using PBN and DMPO as spin trap**

A solution of toluene (5 ml), PBN (10 mg) or DMPO (10 μL) and metal catalysts (30 mg) were stirred under argon at 60 °C for 5 min, after strict extrusion of O<sub>2</sub> by freeze-pump-thaw cycles, EDA (500 μL, 4.73 mmol) was introduced to the systems. Then 2 μL of the solution was collected and detected by room-temperature EPR.

#### **Cell imaging**

Hela cervical carcinoma cells and Cos7 monkey kidney fibroblast cells were incubated in Dulbecco's Modified Eagle's Medium (DMEM) supplemented with 10% fetal bovine serum (FBS) and 1% antibiotics with 5% CO<sub>2</sub> at 37 °C. Cells were seeded in a 6-well plate at a density of 10<sup>5</sup> cells per well and cultured in 1 mL DMEM with 10% FBS for 24 h. Then, a solution of the copolymer (500 μg) dissolved in 1 mL DMEM with the addition of 10% FBS, 1% antibiotics and 5% DMSO and further incubated for another 4 h at 37 °C. The cells were washed twice with 1 mL

PBS upon removing the medium. The fluorescence imaging was acquired with confocal laser scanning microscopy (CLSM) equipped with the excitation filter (405/40 nm) and emission filter (535/50 nm).

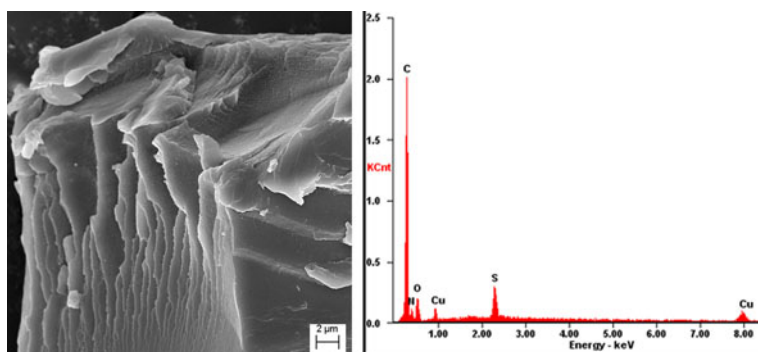

**Fig. S1** SEM and EDS images of poly(imidazole-Cu).

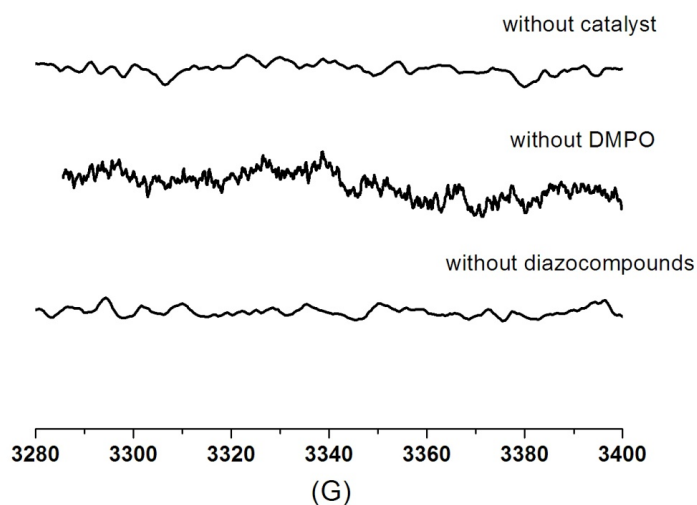

**Fig. S2** Control experiments suggest that in the absence of metal catalysts, EDA or DMPO, no EPR signals could be detected, which in turn confirms that the radicals were generated during the interaction of the metal-catalysts and the diazocompounds.

**Scheme S1** Poly(imidazole-Cu)-mediated C1/C1N2 copolymerization of EDA

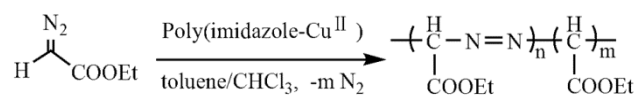

**Table S1** Poly(imidazole-Cu)-mediated C1/C1N2 copolymerization of EDA<sup>a</sup>

| Entry | solvent           | Temperatur<br>e<br>(°C) | yield<br>(%) <sup>b</sup> | $M_n^c$<br>(g mol <sup>-1</sup> ) | $M_w/M_n^c$ | elemental analysis<br>(found) |
|-------|-------------------|-------------------------|---------------------------|-----------------------------------|-------------|-------------------------------|
| 1     | toluene           | 30                      | 71.74                     | 410                               | 1.19        | N, 4.05; C, 49.06; H, 6.07    |
| 2     | toluene           | 45                      | 59.31                     | 488                               | 1.03        | N, 4.39; C, 51.34; H, 6.33    |
| 3     | toluene           | 60                      | 53.67                     | 684                               | 1.15        | N, 4.60; C, 51.22; H, 6.37    |
| 4     | toluene           | 70                      | 46.45                     | 708                               | 1.15        | N, 8.53; C, 53.04; H, 8.05    |
| 5     | toluene           | 100                     | 30.64                     | 786                               | 1.17        | N, 5.60; C, 51.96; H, 5.97    |
| 6     | CHCl <sub>3</sub> | 60                      | 38.40                     | 500                               | 1.01        | N, 9.16; C, 52.80; H, 7.57    |

<sup>a</sup> Experimental conditions: 50 mg poly(imidazole-Cu), 1 ml EDA, 10 ml solvent. <sup>b</sup> Yield=[the weight of copolymer]/[the weight of monomer]\*100%. <sup>c</sup>  $M_n$  and  $M_w/M_n$  were obtained by GPC calibration using standard polystyrenes in THF.

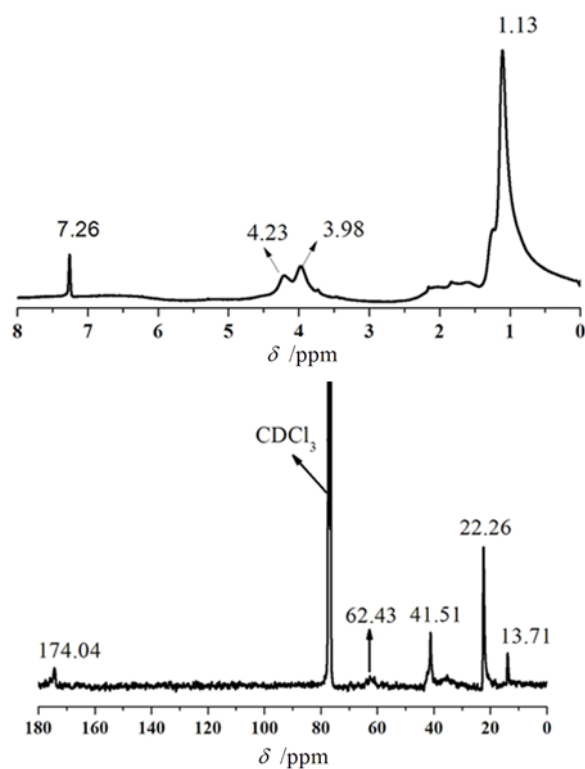

**Fig. S3** <sup>1</sup>H and <sup>13</sup>C NMR spectra of the copolymer obtained with poly(imidazole-Cu)-mediated C1/C1N2 copolymerization of EDA.

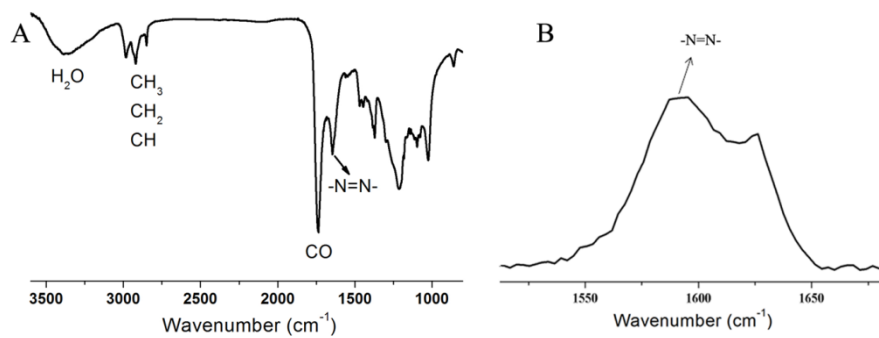

**Fig. S4** FT-IR (A) and Raman spectra of the copolymer obtained with poly(imidazole-Cu)-mediated C1/C1N2 copolymerization of EDA.

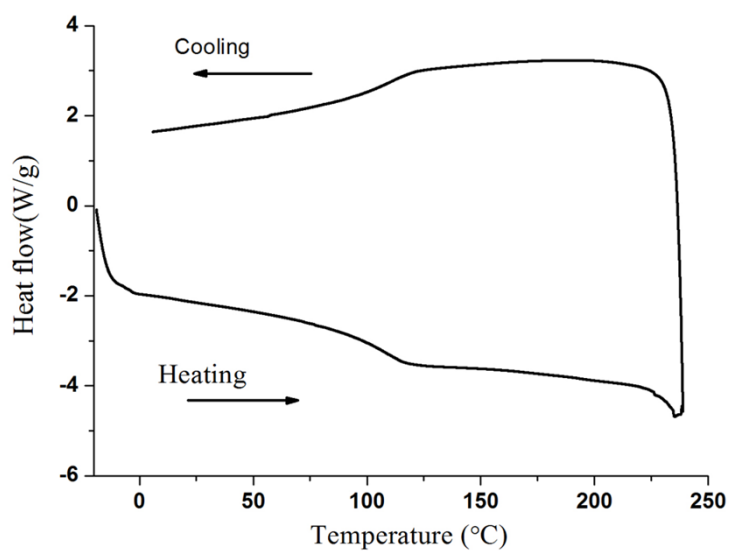

**Fig. S5** DSC heating and cooling curve of amorphous copolymer obtained with poly(imidazole-Cu)-mediated C1/C1N2 copolymerization of EDA.

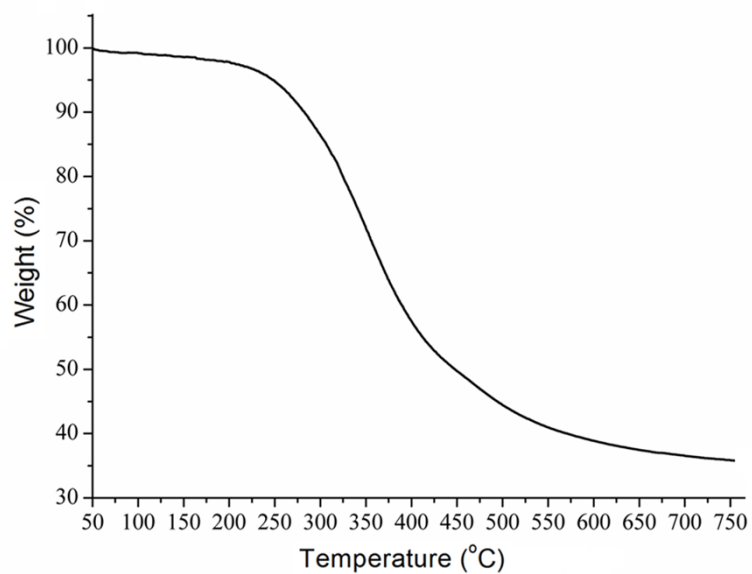

**Fig. S6** TGA curve of the obtained copolymer with poly(imidazole-Cu)-mediated C1/C1N2 copolymerization of EDA.

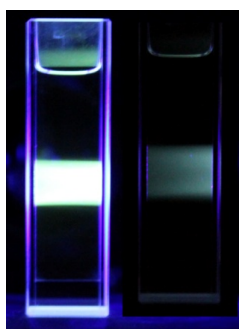

**Fig. S7** Fluorescence photograph of copolymer taken under 448 nm (left) and 844 nm (right) excitation light (CHCl<sub>3</sub> as solvent).

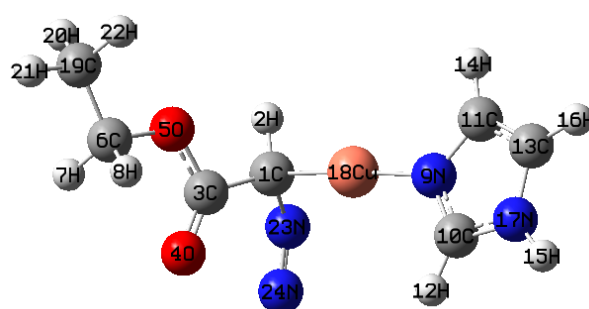

**Fig. S8** Molecular structure of copper-dizao radical optimized by BP86 density functional method.

**Population of atoms:**

| Atom | Alpha_pop. | Beta_pop. | Spin_pop. | Atomic charge |
|------|------------|-----------|-----------|---------------|
| 1(C) | 3.12864    | 3.02415   | 0.10449   | -0.15279      |
| 2(H) | 0.48522    | 0.48912   | -0.00390  | 0.02566       |
| 3(C) | 2.93066    | 2.90901   | 0.02165   | 0.16032       |
| 4(O) | 4.11386    | 4.10361   | 0.01025   | -0.21746      |

|                   |          |          |                       |          |
|-------------------|----------|----------|-----------------------|----------|
| 5(O )             | 4.15314  | 4.14641  | 0.00673               | -0.29955 |
| 6(C )             | 2.94044  | 2.93597  | 0.00447               | 0.12359  |
| 7(H )             | 0.48239  | 0.48247  | -0.00008              | 0.03514  |
| 8(H )             | 0.48868  | 0.48826  | 0.00042               | 0.02306  |
| 9(N )             | 3.62354  | 3.62276  | 0.00078               | -0.24629 |
| 10(C )            | 2.93540  | 2.92781  | 0.00760               | 0.13679  |
| 11(C )            | 2.97463  | 2.97386  | 0.00077               | 0.05151  |
| 12(H )            | 0.45881  | 0.45925  | -0.00045              | 0.08194  |
| 13(C )            | 2.99000  | 2.99084  | -0.00084              | 0.01917  |
| 14(H )            | 0.47369  | 0.47383  | -0.00014              | 0.05248  |
| 15(H )            | 0.41807  | 0.41799  | 0.00009               | 0.16394  |
| 16(H )            | 0.47349  | 0.47341  | 0.00009               | 0.05310  |
| 17(N )            | 3.53892  | 3.53763  | 0.00129               | -0.07656 |
| 18(Cu)            | 14.38501 | 14.37044 | 0.01456               | 0.24455  |
| 19(C )            | 3.03262  | 3.03282  | -0.00020              | -0.06544 |
| 20(H )            | 0.47861  | 0.47858  | 0.00003               | 0.04280  |
| 21(H )            | 0.48494  | 0.48436  | 0.00057               | 0.03070  |
| 22(H )            | 0.48204  | 0.48204  | -0.00001              | 0.03592  |
| 23(N )            | 3.62045  | 3.44898  | 0.17147               | -0.06943 |
| 24(N )            | 3.90675  | 3.24640  | 0.66036               | -0.15315 |
| Total net charge: |          | 0.00000  | Total spin electrons: | 1.00000  |

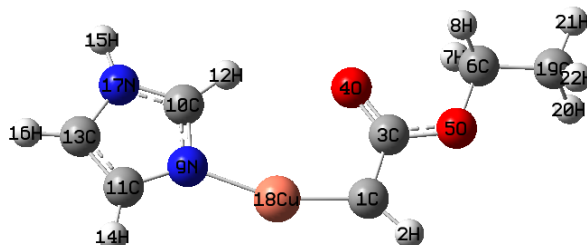

**Fig. S9** Molecular structure of copper-carbene radical optimized by BP86 density functional method.

#### Population of atoms:

| Atom | Alpha_pop. | Beta_pop. | Spin_pop. | Atomic   | charge |
|------|------------|-----------|-----------|----------|--------|
| 1(C) | 3.53575    | 2.75438   | 0.78137   | -0.29013 |        |
| 2(H) | 0.48281    | 0.51717   | -0.03436  | 0.00003  |        |
| 3(C) | 2.88192    | 2.90451   | -0.02260  | 0.21357  |        |
| 4(O) | 4.22174    | 4.06549   | 0.15625   | -0.28723 |        |
| 5(O) | 4.16415    | 4.12281   | 0.04134   | -0.28695 |        |
| 6(C) | 2.93633    | 2.93914   | -0.00281  | 0.12453  |        |
| 7(H) | 0.49001    | 0.48696   | 0.00304   | 0.02303  |        |
| 8(H) | 0.49001    | 0.48696   | 0.00304   | 0.02303  |        |
| 9(N) | 3.62001    | 3.62565   | -0.00564  | -0.24567 |        |



---

|        |                      |          |                               |          |
|--------|----------------------|----------|-------------------------------|----------|
| 10(C)  | 2.93521              | 2.92438  | 0.01083                       | 0.14041  |
| 11(C)  | 2.98199              | 2.97832  | 0.00368                       | 0.03969  |
| 12(H)  | 0.45446              | 0.45572  | -0.00125                      | 0.08982  |
| 13(C)  | 2.99418              | 2.99529  | -0.00111                      | 0.01053  |
| 14(H)  | 0.47788              | 0.47814  | -0.00026                      | 0.04397  |
| 15(H)  | 0.41962              | 0.41973  | -0.00011                      | 0.16065  |
| 16(H)  | 0.47700              | 0.47706  | -0.00006                      | 0.04595  |
| 17(N)  | 3.53521              | 3.53404  | 0.00117                       | -0.06925 |
| 18(Cu) | 14.42271             | 14.35547 | 0.06724                       | 0.22182  |
| 19(C)  | 3.03297              | 3.03300  | -0.00003                      | -0.06597 |
| 20(H)  | 0.47988              | 0.47968  | 0.00021                       | 0.04044  |
| 21(H)  | 0.48628              | 0.48644  | -0.00015                      | 0.02728  |
| 22(H)  | 0.47988              | 0.47968  | 0.00021                       | 0.04044  |
| Total  | Net charge: -0.00000 |          | Total spin electrons: 1.00000 |          |

---
